# Supplementary material for: In situ detection of hydroxyl radicals in mitochondrial oxidative stress with a nanopipette electrode
Source: Royal Society of Chemistry journal article supplement (doi:10.1039/d0cc05889k), 2020-01-01
Supplement: d0cc05889k2.pdf [file d0cc05889k2.pdf]

## Electronic Supplementary Information

### In situ detection of hydroxyl radicals in mitochondrial oxidative stress with nanopipette electrode

Wenting Chen, Shushu Ding, Jiaren Wu, Guoyue Shi,\* and Anwei Zhu\*

*School of Chemistry and Molecular Engineering, Shanghai Key Laboratory for Urban  
Ecological Processes and Eco-Restoration, East China Normal University, 500 Dong Chuan  
Road, Shanghai 200241, People's Republic of China.*

E-mail: awzhu@chem.ecnu.edu.cn

Tel: +86-21-54340042; Fax: +86-21-54340042

## **Contents:**

1. Experimental Section
2. SEM image of the unmodified glass nanopore tip (Figure S1)
3. Fabrication of hexanethiol-modified nanopore electrode (Figure S2)
4. TEM and EDX images of Au-free and Au-modified glass nanopore tip (Figure S3)
5. TEM elemental mappings of Au membrane-coated glass nanopore (Figure S4)
6. XPS (Figure S5)
7. Reaction time (Figure S6)
8. Selectivity experiment (Figure S7)
9. Microscopic images of cells (Figure S8)
10. Effect of DMSO on A $\beta$ -stimulated cells (Figure S9)
11. Comparison of the performance of different methods for the determination of  $\bullet$ OH (Table S1)

# 1. EXPERIMENTAL SECTION

## Chemicals and Reagents

Borosilicate glass capillaries (BF100-78-10; i.d. = 0.78 mm; o.d. = 1 mm, with filament) were purchased from Sutter Instrument Co.. Gold (III) chloride trihydrate ( $\text{HAuCl}_4 \cdot 3\text{H}_2\text{O}$ ), 1-hexanethiol (HAT), and 3-(4,5-dimethyl-2-thiazolyl)-2,5-diphenyl-2H-tetrazolium bromide (MTT) were bought from Sigma-Aldrich.  $\text{KO}_2$ , DMSO, NaClO,  $\text{FeSO}_4$ , 2,2'-azobis (2-methylpropionamide)-dihydrochloride (AAPH), and diethylamine nonoate (DEA NONOate) were acquired from Aladdin Chemistry Co. Ltd. Hoechst 33258, Mito Tracker Deep Red FM, calcein-AM, propidium iodide were provided by Invitrogen Corp. 4-(2-hydroxyethyl)-1-piperazineethane sulfonic acid (HEPES), KCl, HCl, NaOH, 30%  $\text{H}_2\text{O}_2$  and 98%  $\text{H}_2\text{SO}_4$  were prepared from Sinopharm Chemical Reagent Co., Ltd.

## Apparatus and Instrumentation

Glass capillaries were pulled by a laser puller (Sutter P-2000 micropipette puller). A Hitachi S-4800 scanning electron microscope provided scanning electron microscope (SEM) images at 15 kV accelerating voltage. An ultrathin coating of platinum was ejected onto the unmodified nanopore before SEM analysis. A JEOL JEM-2100 transmission electron microscope was employed to obtain transmission electron microscope (TEM) images, energy-dispersive X-ray (EDX) spectrum, and elemental mappings. X-ray photoelectron spectrometer (XPS) data were collected from a Thermo Scientific ESCALAB 250Xi. Zeta potential was detected by a Malvern Zetasizer Nano ZS90. The static contact angle was caught by a JC2000A contact angle meter (Shanghai Zhongchen Digital Technology Co. Ltd., China). The Sensapex zero drift manipulator was applied for positioning nanoelectrode under the observation by Leica TCS-SP8 confocal scanning microscope.

## Fabrication of Hexanethiol-Modified Glass Nanopipettes

To remove organic residue from the capillary glass surface, the borosilicate glass capillaries should be completely immersed in piranha solution (98%  $\text{H}_2\text{SO}_4$  : 30%  $\text{H}_2\text{O}_2$  = 3 : 1) for 2 h before pulling. The capillaries were then ultrasound in large quantities of deionized water for another 1 h and dried in an oven at 80°C. Nanopipettes used in the experiment were then fabricated by a Sutter P-2000 laser puller. The shape and tip size of the nanopipette can be adjusted by setting different heating temperatures, speed, delay time, tension value, and other parameters of the laser puller. The parameters used in this work is: HEAT = 280; FIL = 3; VEL = 40; DEL = 180; PULL = 200. The pulled glass nanopipette was coated with gold film by the UV irradiation method.<sup>1</sup> First, ethanol and chloroauric acid were mixed with a volume ratio of 2:3 and the mixture was injected into the nanopipette with a microsyringe. Then, the nanopipette was exposed to a UV light (254 nm, 8W) for 2 h and the excess solution in the nanopipette was removed. Finally, the nanopipette was cleaned with ethanol and dried at room temperature, followed by being baked in an oven at 100 °C for 1 h. For further modification of the above nanopipette with HAT, ethanol solution of 20% HAT was injected into the nanopipette and left for 15 h at room temperature. Subsequently, the nanopipette was washed with ethanol and deionized water and dried at room temperature.

## Ionic Current Measurement

The ionic currents of nanopipette was tested employing a HEKA EPC 10 double patch clamp amplifier. The electrolyte solution inside and outside the glass nanopipette were both 10 mM KCl solution (buffered with 0.01 M HEPES, pH 7.4). Two Ag|AgCl electrodes were used to apply a voltage to the nanopipette. One electrode was inserted in the nanopipette as a working electrode, and the other was placed in the external bulk solution as a reference/auxiliary electrode. The voltage scanned from -1.0 V to +1.0 V with a scan rate of 50 mV/s. Each experiment was repeated five times to obtain the average current value. All electrochemical tests were carried out at room temperature of 25 °C in a shielding chamber.

•OH radicals were generated by Fenton reaction (see Eq.1) and the concentration of •OH was varied by regulating the amounts of Fe<sup>2+</sup> and H<sub>2</sub>O<sub>2</sub> (Fe<sup>2+</sup> / H<sub>2</sub>O<sub>2</sub> = 1:6). The concentration of •OH generated was considered to be the same as that of Fe<sup>2+</sup> due to the excess of H<sub>2</sub>O<sub>2</sub>. Considering the ultrashort lifetime of •OH, the Fenton reagent was freshly prepared for all experiments. In a typical experiment, the nanopipette electrode was first immersed into the Fe<sup>2+</sup> solution followed by the addition of H<sub>2</sub>O<sub>2</sub>. After the reaction of the nanopipette with Fenton reagent for a constant time (15 min), the ionic current was collected.

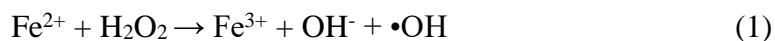

## Cell Culture and Treatment

RAW 264.7 macrophages were cultured in Dulbecco's modified eagle's medium (DMEM) supplemented with penicillin (100 units mL<sup>-1</sup>), streptomycin (100 µg mL<sup>-1</sup>), and fetal bovine serum (10%, v/v) at 37 °C under a humidified 5% CO<sub>2</sub> atmosphere. Before experiments, cells were transferred to a 35 mm Petri dish with 14 mm bottom well and allowed to adhere and incubate for 24 h before using.

## Single Cell Experiment

The zero drift micromanipulator from Sensapex Instrument was employed for locating nanopipette around mitochondria under the help of fluorescence imaging of mitochondria by Leica TCS-SP8 confocal scanning microscope and the mitochondrial stain Mito Tracker Deep Red FM. To detect •OH produced by mitochondrial oxidative stress, Aβ<sub>1-42</sub> was used to stimulate RAW 264.7 macrophages.<sup>2</sup> The freeze-dried powder Aβ<sub>1-42</sub> oligomer was dissolved in anhydrous DMSO to form 100 µM Aβ<sub>1-42</sub> solution. The solution was then diluted to 20 µM and incubated with RAW 264.7 macrophages at logarithmic growth for 12 h under 37°C.

## Cell Viability

Cell viability was determined by MTT assay. In brief, after Aβ treatment, the cells were incubated in a new culture medium containing 0.5 mg/mL MTT solution for 4 h. After the medium was removed, the formazan blue formed in the cells was dissolved by DMSO. The absorbance was detected at 490 nm. Cell viability was determined by the following formula : cell viability (%) = ( absorbance of the experimental group/absorbance of the blank control group ) × 100%.

## 2. SEM image of the unmodified glass nanopore tip

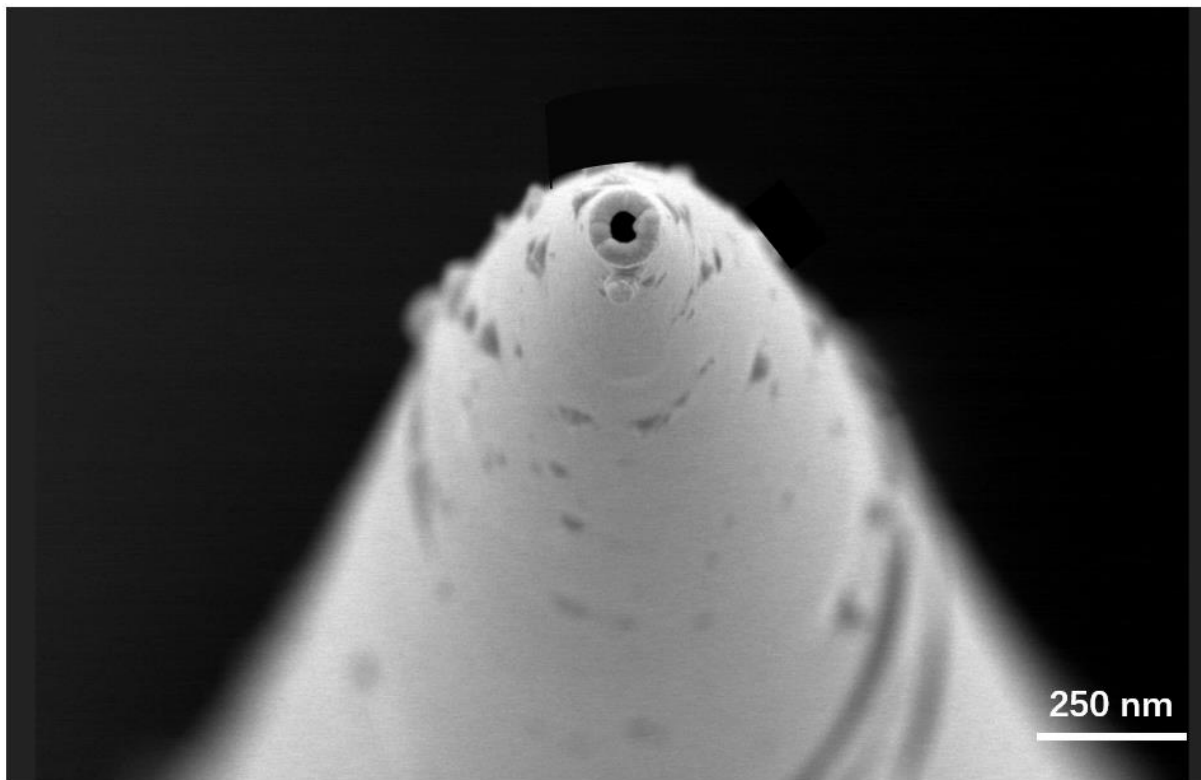

**Figure S1.** SEM image of the unmodified glass nanopore tip.

### 3. Fabrication of hexanethiol-modified nanopore electrode

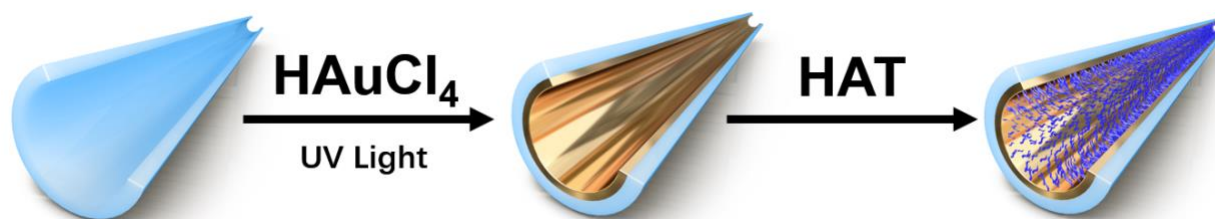

**Figure S2.** Stepwise modification of HAT functionalized nanopore.

#### 4. TEM and EDX images of Au-free and Au-modified glass nanopore tip

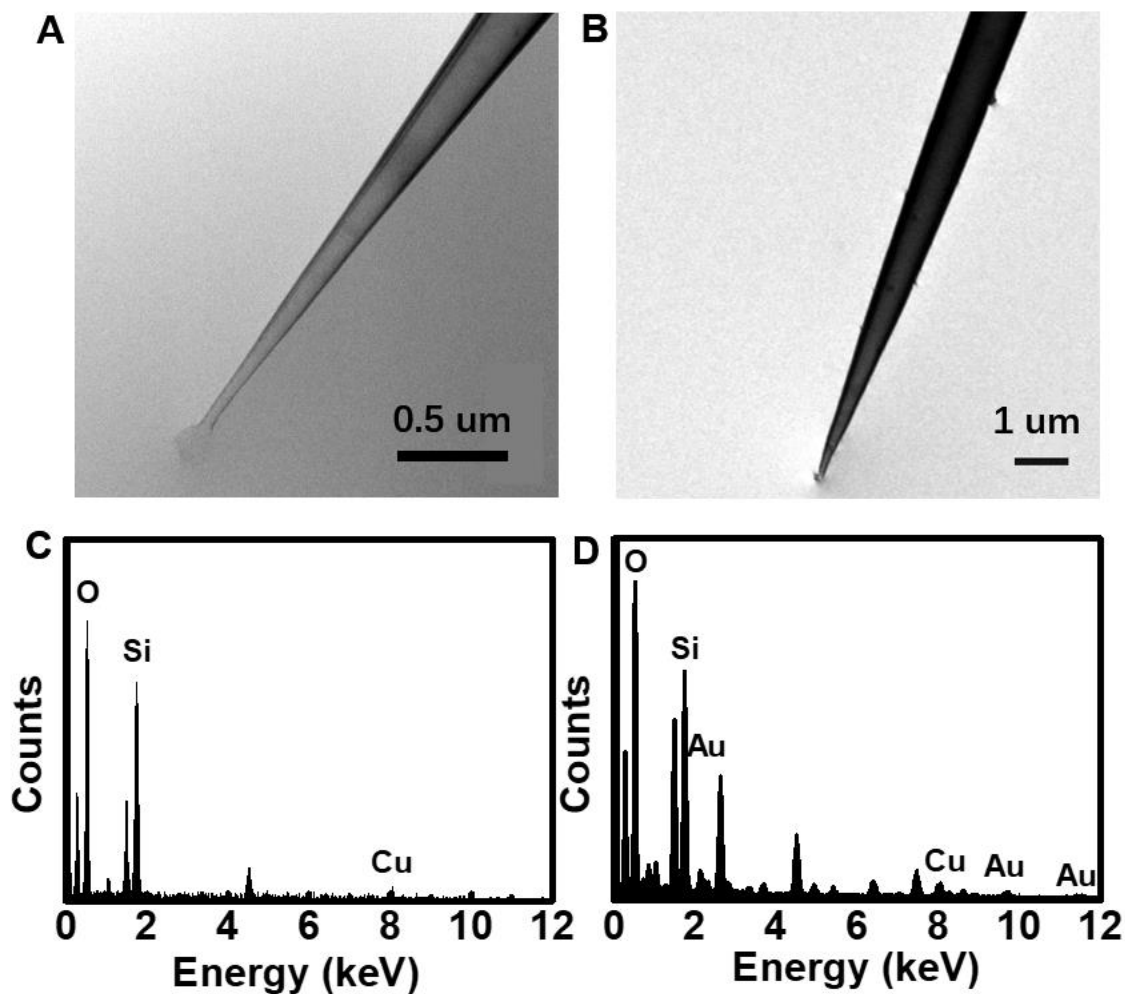

**Figure S3.** (A,B) medium-magnification TEM images and (C,D) EDX spectra of (A,C) the unmodified (Au-free) glass nanopore tip and (B,D) the Au-modified glass nanopore tip .

## 5. TEM elemental mappings of Au membrane-coated glass nanopore

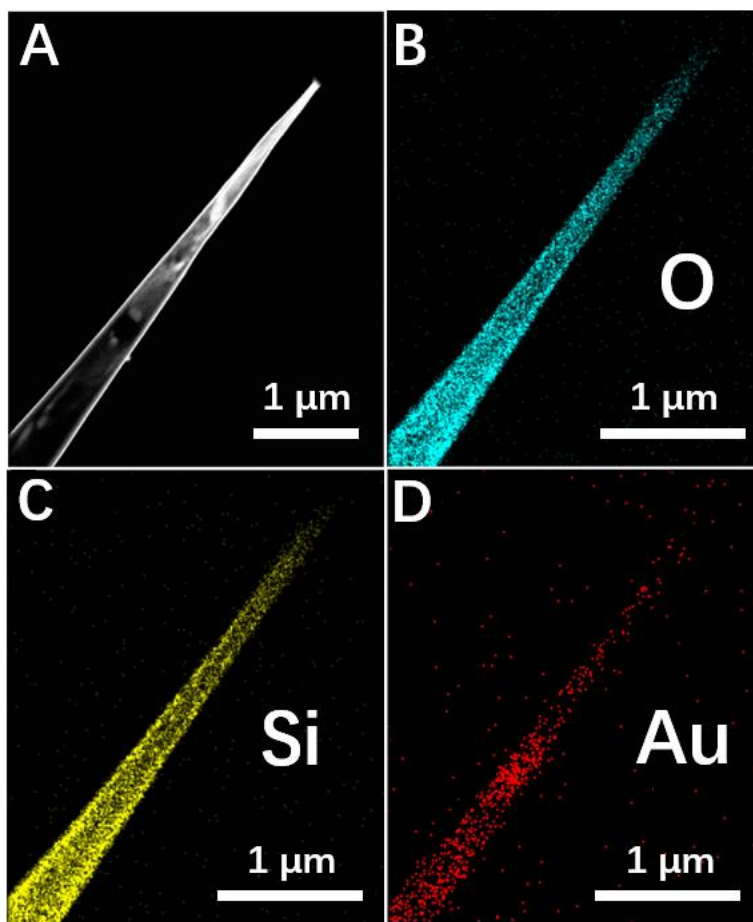

**Figure S4.** Dark-field TEM image (A) and the corresponding TEM elemental mappings (B-D, O, Si and Au) of Au membrane-coated glass nanopore.

## 6. XPS

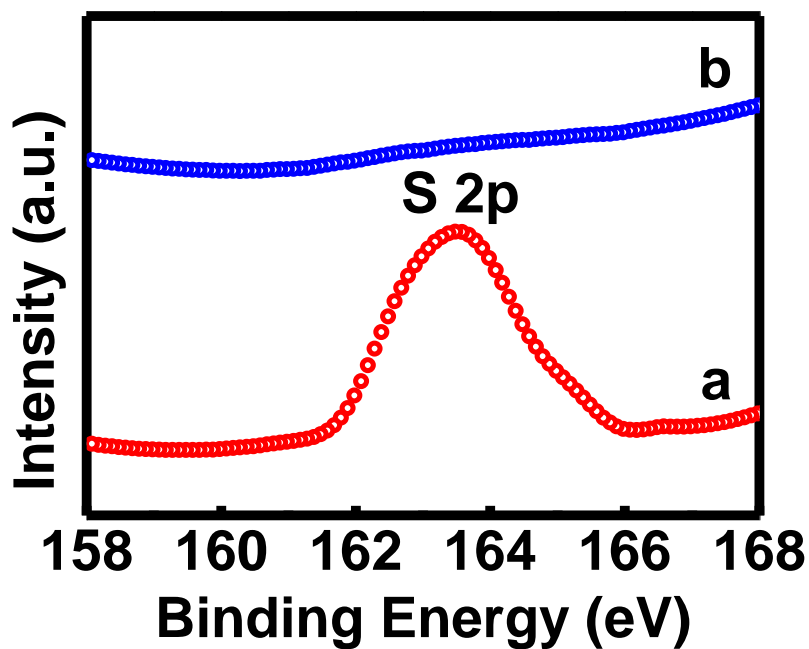

**Figure S5.** XPS for S 2p obtained at HAT-modified nanopipette electrode (a) before and (b) after treatment with 350 nM  $\bullet\text{OH}$ .

As displayed in Figure S5, the peak of S 2p disappeared after the reaction of nanopipette with  $\bullet\text{OH}$ , indicating the successful destruction of hexanethiol modified on the surface of electrode.

## 7. Reaction time

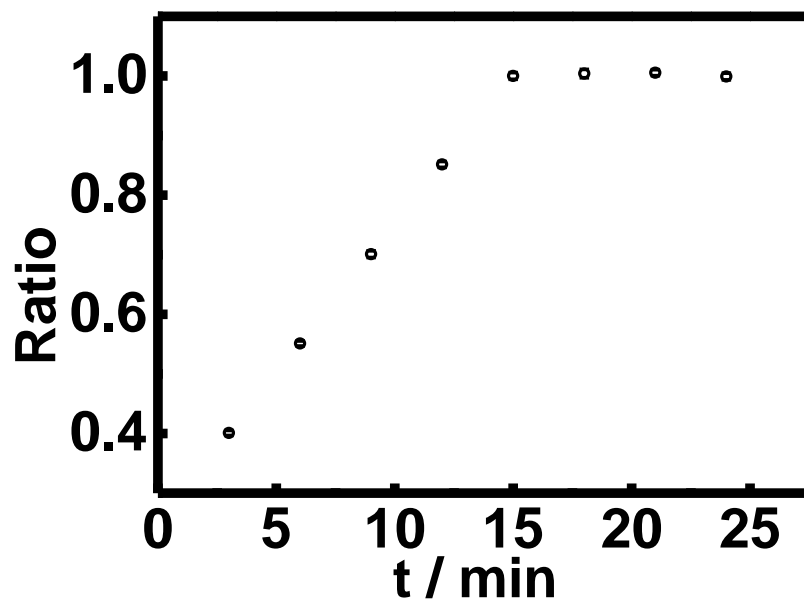

**Figure S6.** Effect of reaction time on ionic current change ratio at -1.0 V in the presence of Fenton reagent (350 nM  $\text{Fe}^{2+}$  + 2.1  $\mu\text{M}$   $\text{H}_2\text{O}_2$ ).

As displayed in Figure S6, the current response of nanopipette electrode rose to a maximum at ~15 min and then stabilized. Therefore, we chose 15 min as the optimal reaction time.

## 8. Selectivity experiment

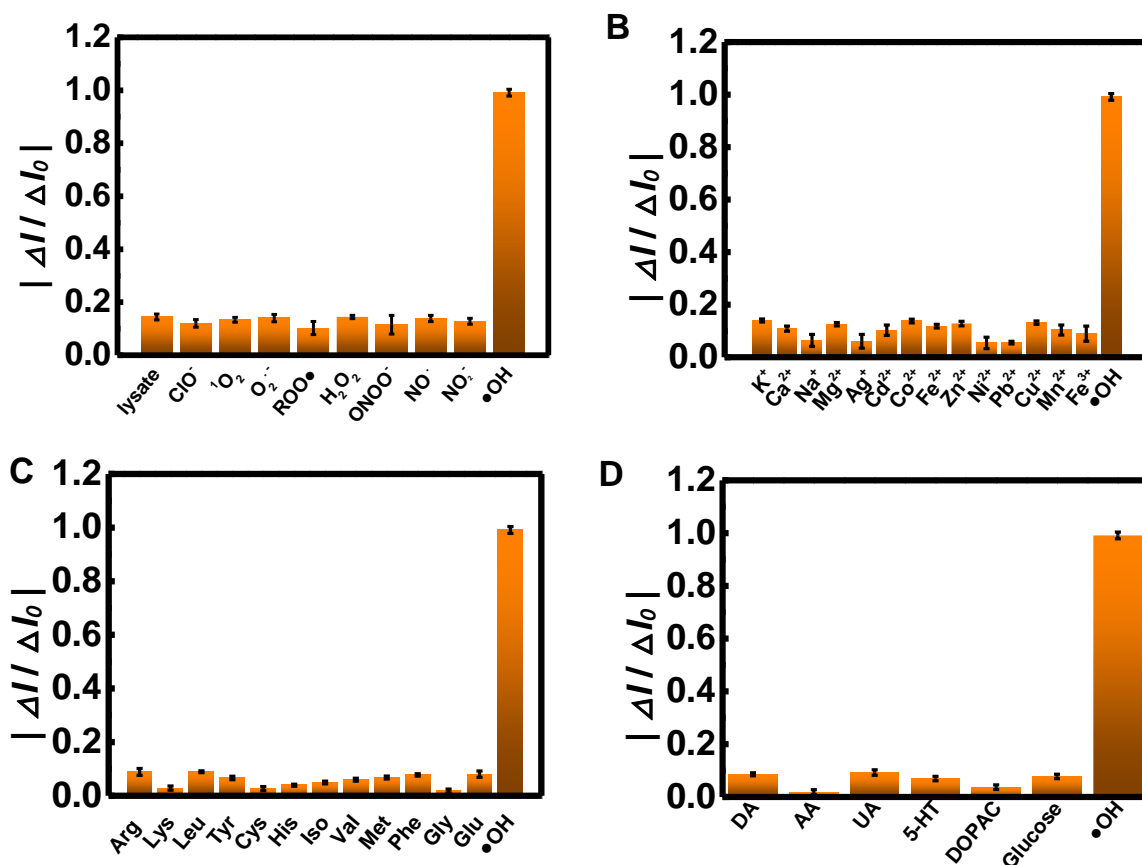

**Figure S7.** Selectivity experiments for the nanopipettes toward (A) other ROS/RNS and cell lysate (0.1mM for other ROS/RNS; 5 nM for  $\bullet\text{OH}$ ). (B) metal ions (1 mM for  $\text{K}^+$ ,  $\text{Ca}^{2+}$ ,  $\text{Na}^+$ ,  $\text{Mg}^{2+}$ ; 10  $\mu\text{M}$  for other metal ions; 5 nM for  $\bullet\text{OH}$ ). (C) amino acids (10  $\mu\text{M}$  for all the tested amino acids, 5 nM for  $\bullet\text{OH}$ ). (D) other biological molecules (20  $\mu\text{M}$  DA, 50  $\mu\text{M}$  AA, 20  $\mu\text{M}$  UA, 20  $\mu\text{M}$  5-HT, 50  $\mu\text{M}$  DOPAC, 1 mM glucose). Current change ratio represents  $[(I-I_0) / I_0]$  induced by interferences when the modified nanopipettes were immersed in 10 mM HEPES solution (pH 7.4).

## 9. Microscopic images of cells

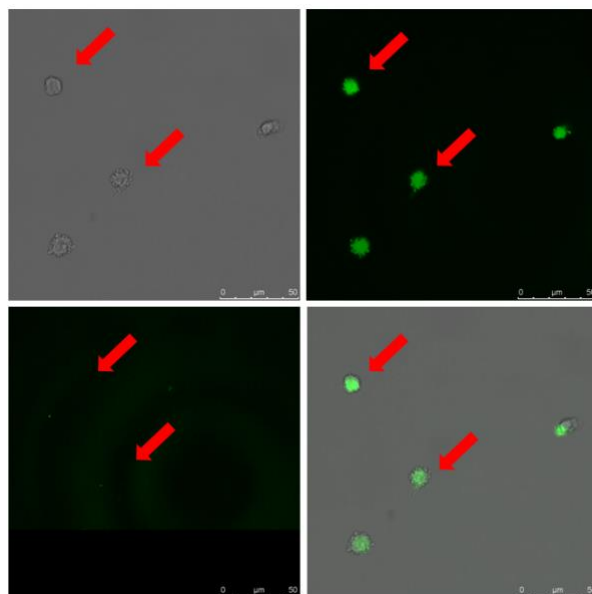

**Figure S8.** Bright-field (BF) and fluorescence imaging of macrophages without insertion or penetrated by nanopipette electrodes (indicated by arrows). The cells were stained with Calcein-AM and propidium iodide (PI) before imaging. The unmarked cells are controls (no insertion). Merge = merged image of BF, Calcein-AM, and PI images. Scale bar: 50  $\mu\text{m}$ . (Calcein-AM: a fluorescent dye that can stain the living cells, PI: Propidium Iodide, a fluorescent dye that can enter the cell to stain the cell nucleus when the cell membrane is broken).

HAT modified nanopores were inserted into the RAW 264.7 macrophages and then withdrawn. Calcein-AM and PI were then added to the medium at a final concentration of 3  $\mu\text{g}/\text{ml}$  following the manufacturer's protocols. After incubation under cell culture condition for 15 min, the residual dyes were washed off and the microphotographs were taken with the confocal laser scanning microscope.

## 10. Effect of DMSO on A $\beta$ -stimulated cells

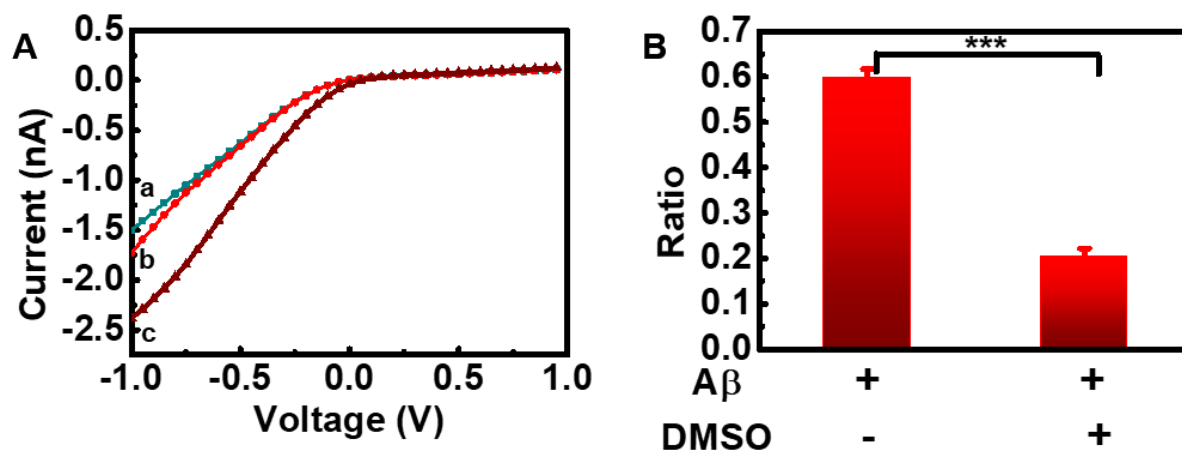

**Figure S9.** (A)  $I$ - $V$  curve of functionalized nanopore recorded before (a) and after being inserted into the cytoplasm of the A $\beta$ -stimulated cells without (c) and with (b) 0.1% DMSO treatment in advance and (B) the corresponding  $\bullet\text{OH}$  concentration changes. The results are presented as mean  $\pm$  standard deviation ( $n=3$ ). Significant differences (\*\* $p<0.001$ ) are performed by Student's  $t$ -test.

**Table S1 Comparison of the performance of different methods for the determination of •OH**

| Method                                                          | Linear range (μM)                             | Limit of detection (μM) | Single cell | In-situ detection | Refs      |
|-----------------------------------------------------------------|-----------------------------------------------|-------------------------|-------------|-------------------|-----------|
| EPR                                                             | /                                             | 0.01-1                  | No          | No                | 3         |
| HPLC                                                            | 0.1-100                                       | 0.1                     | No          | No                | 4         |
| Square wave voltammetry ( FcHT electrode )                      | $5.0 \times 10^{-3}$ - $45.0 \times 10^{-3}$  | $0.37 \times 10^{-3}$   | No          | No                | 5         |
| Electrochemical impedance method ( indium tin oxide electrode ) | $0.9 \times 10^{-3}$ - $21.9 \times 10^{-3}$  | $0.9 \times 10^{-3}$    | No          | No                | 6         |
| Ionic current rectification ( 1-hexanethiol nanoelectrode )     | $1.0 \times 10^{-3}$ - $250.0 \times 10^{-3}$ | $1.0 \times 10^{-3}$    | Single cell | In-situ           | This work |

## Contents:

- (1) X. Xu, H. He, Y. Jin, *Anal. Chem.*, 2015, **87**, 3216.
- (2) A. Klegeris and P. L. McGeer, *J. Neurosci. Res.*, 1997, **49**, 229-235.
- (3) A. Nonaka, T. Manabe, N. Asano, T. Kyogoku, K. Imanishi, K. Tamura, T. Tobe, Y. Sugiura and K. Makino, *Int. J. Pancreatol.*, 1989, **5**, 203-211.
- (4) S. Fukui, Y. Hanasaki, S. Ogawa, *J. Chromatogr. A*, 1993, **630**, 187-193.
- (5) L. Li, A. Zhu and Y. Tian, *Chem. Commun.*, 2013, **49**, 1279.
- (6) A. Zhu, Y. Liu, Q. Rui and Y. Tian, *Chem. Commun.*, 2011, **47**, 4279.
